# Supplementary material for: Non-absorbable antibiotic treatment inhibits colorectal cancer liver metastasis by modulating deoxycholic acid metabolism by intestinal microbes
Source: PubMed Central journal article supplement (PMC8824892; doi:10.7150/jca.63490), 2022-01-01
Supplement: jcav13p0764s1.pdf [file jcav13p0764s1.pdf]

**A****Control**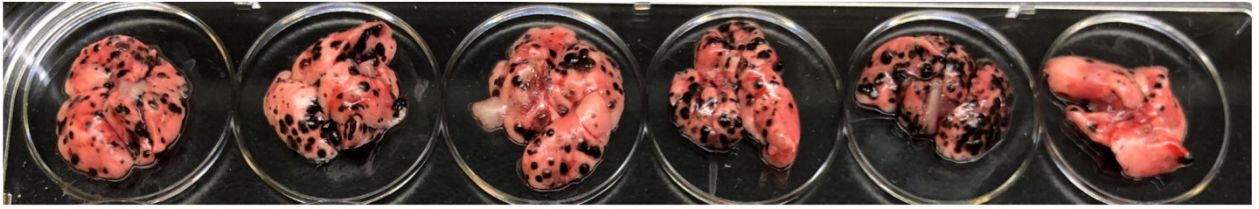**Antibiotics**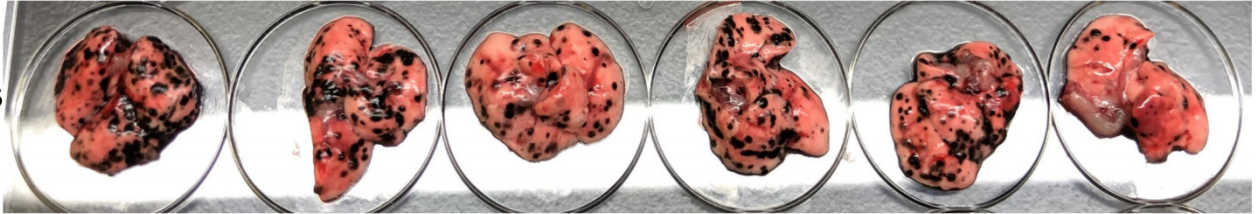**B**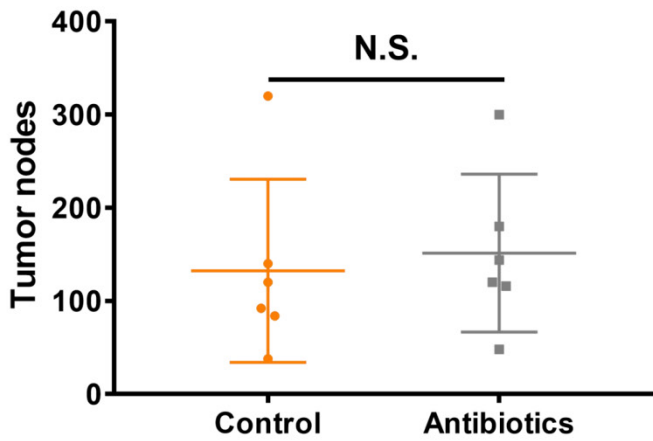**C**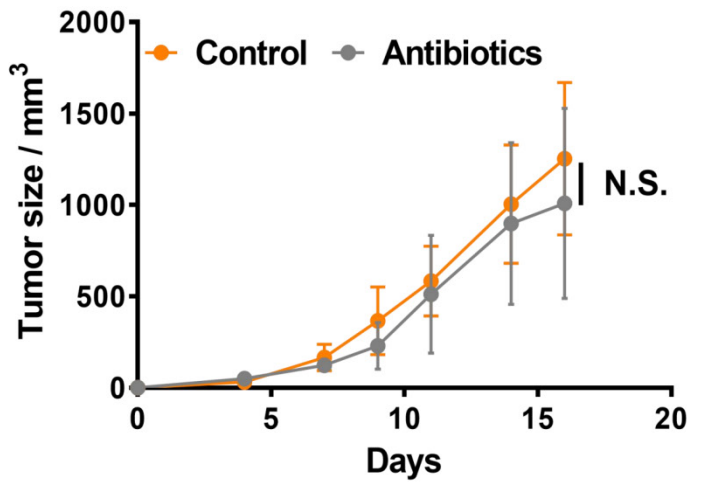

### Supplementary materials

**Supplementary Figure 1.** Non-absorbable antibiotic treatment does not influence tumor lung metastasis and subcutaneous flank tumor proliferation in a mouse model.

(A) No significant difference was observed between the control group and the antibiotic treatment group in a tail vein injection lung metastasis model in C57BL/6 mice. (B) Number of metastatic tumor nodes in the lungs. (C) Curve of tumor size in the subcutaneous flank tumor proliferation model. N.S., no significance.

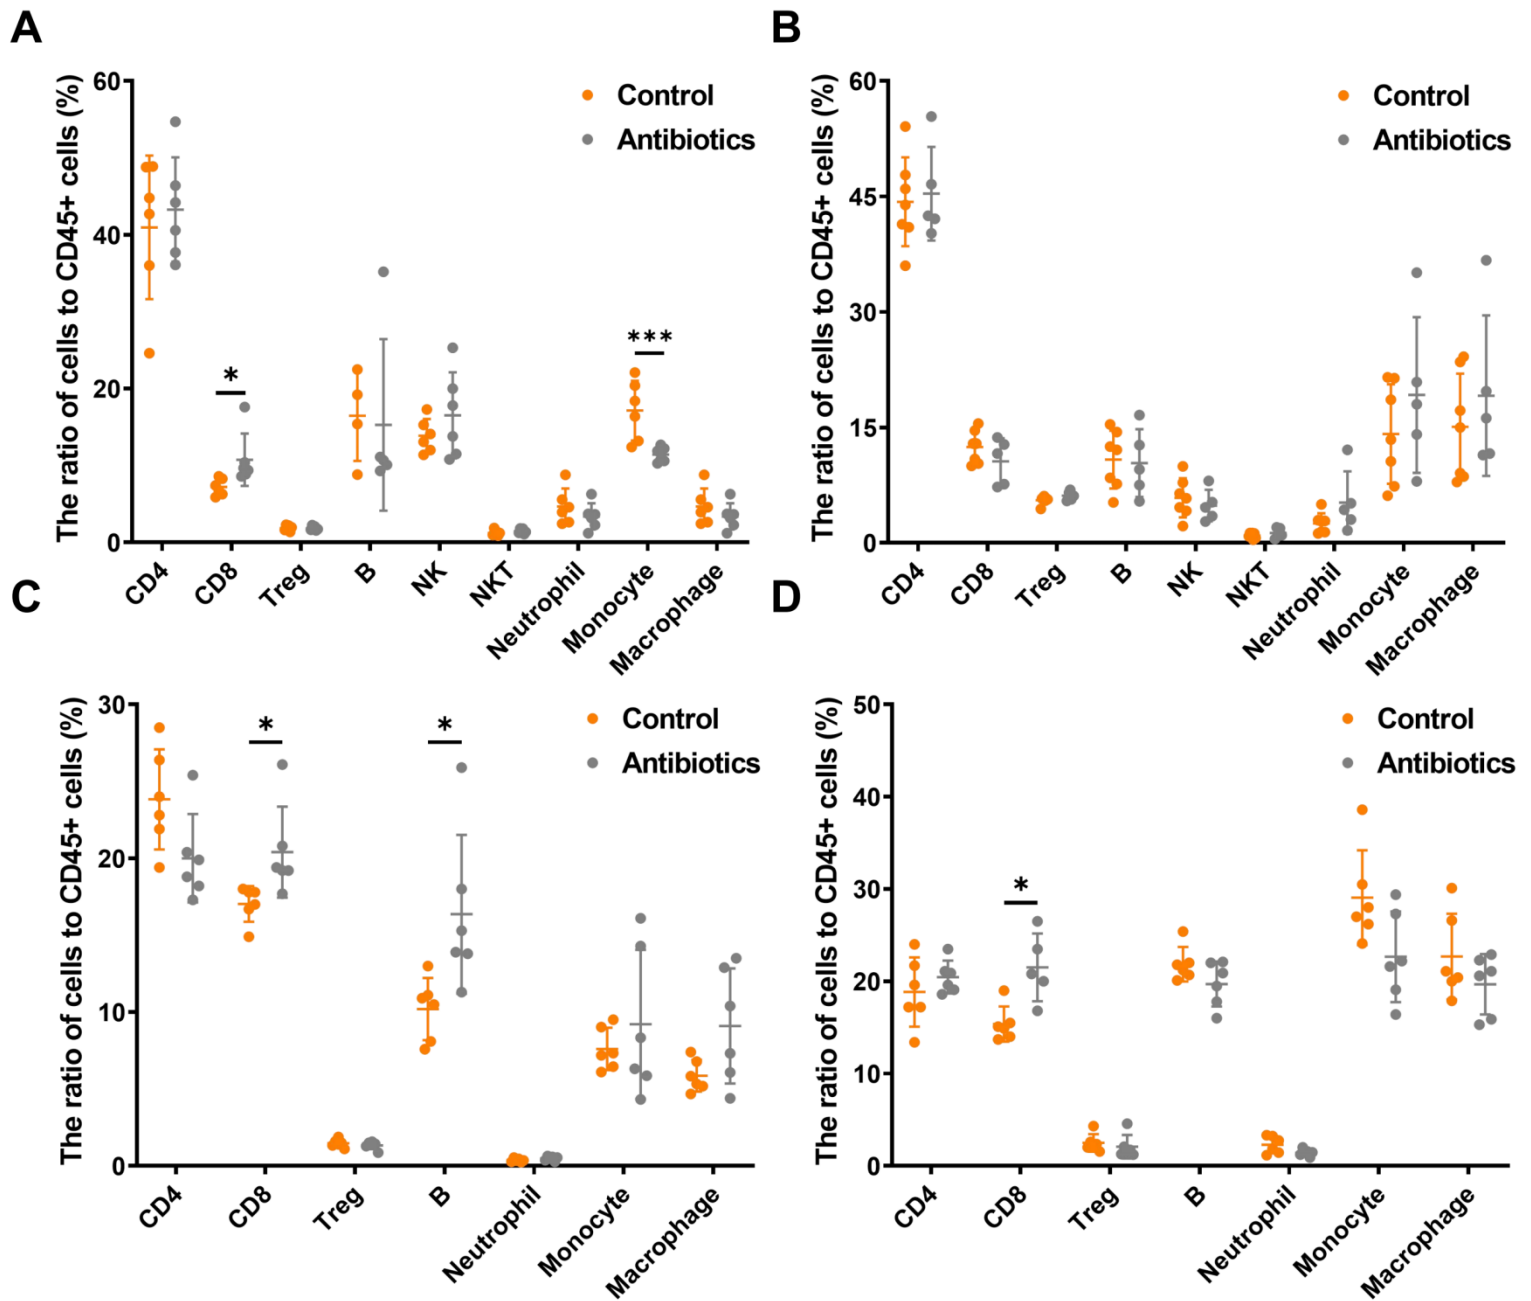

**Supplementary Figure 2.** Non-absorbable antibiotic treatment slightly increases the proportion of CD8 T cells the in liver. (A) Changes in liver immune cells in BALB/c mice without tumors after treatment with non-absorbable antibiotics for two weeks and (B) in BALB/c mice with metastatic tumors after treatment with non-absorbable antibiotics for four weeks. (C) Changes in liver immune cells in C57BL/6J mice without tumors after treatment with non-absorbable antibiotics for two weeks and (D) in C57BL/6J mice with metastatic tumors after treatment with non-absorbable antibiotics for four weeks. \* $P < 0.05$ , \*\*\* $P < 0.001$ .

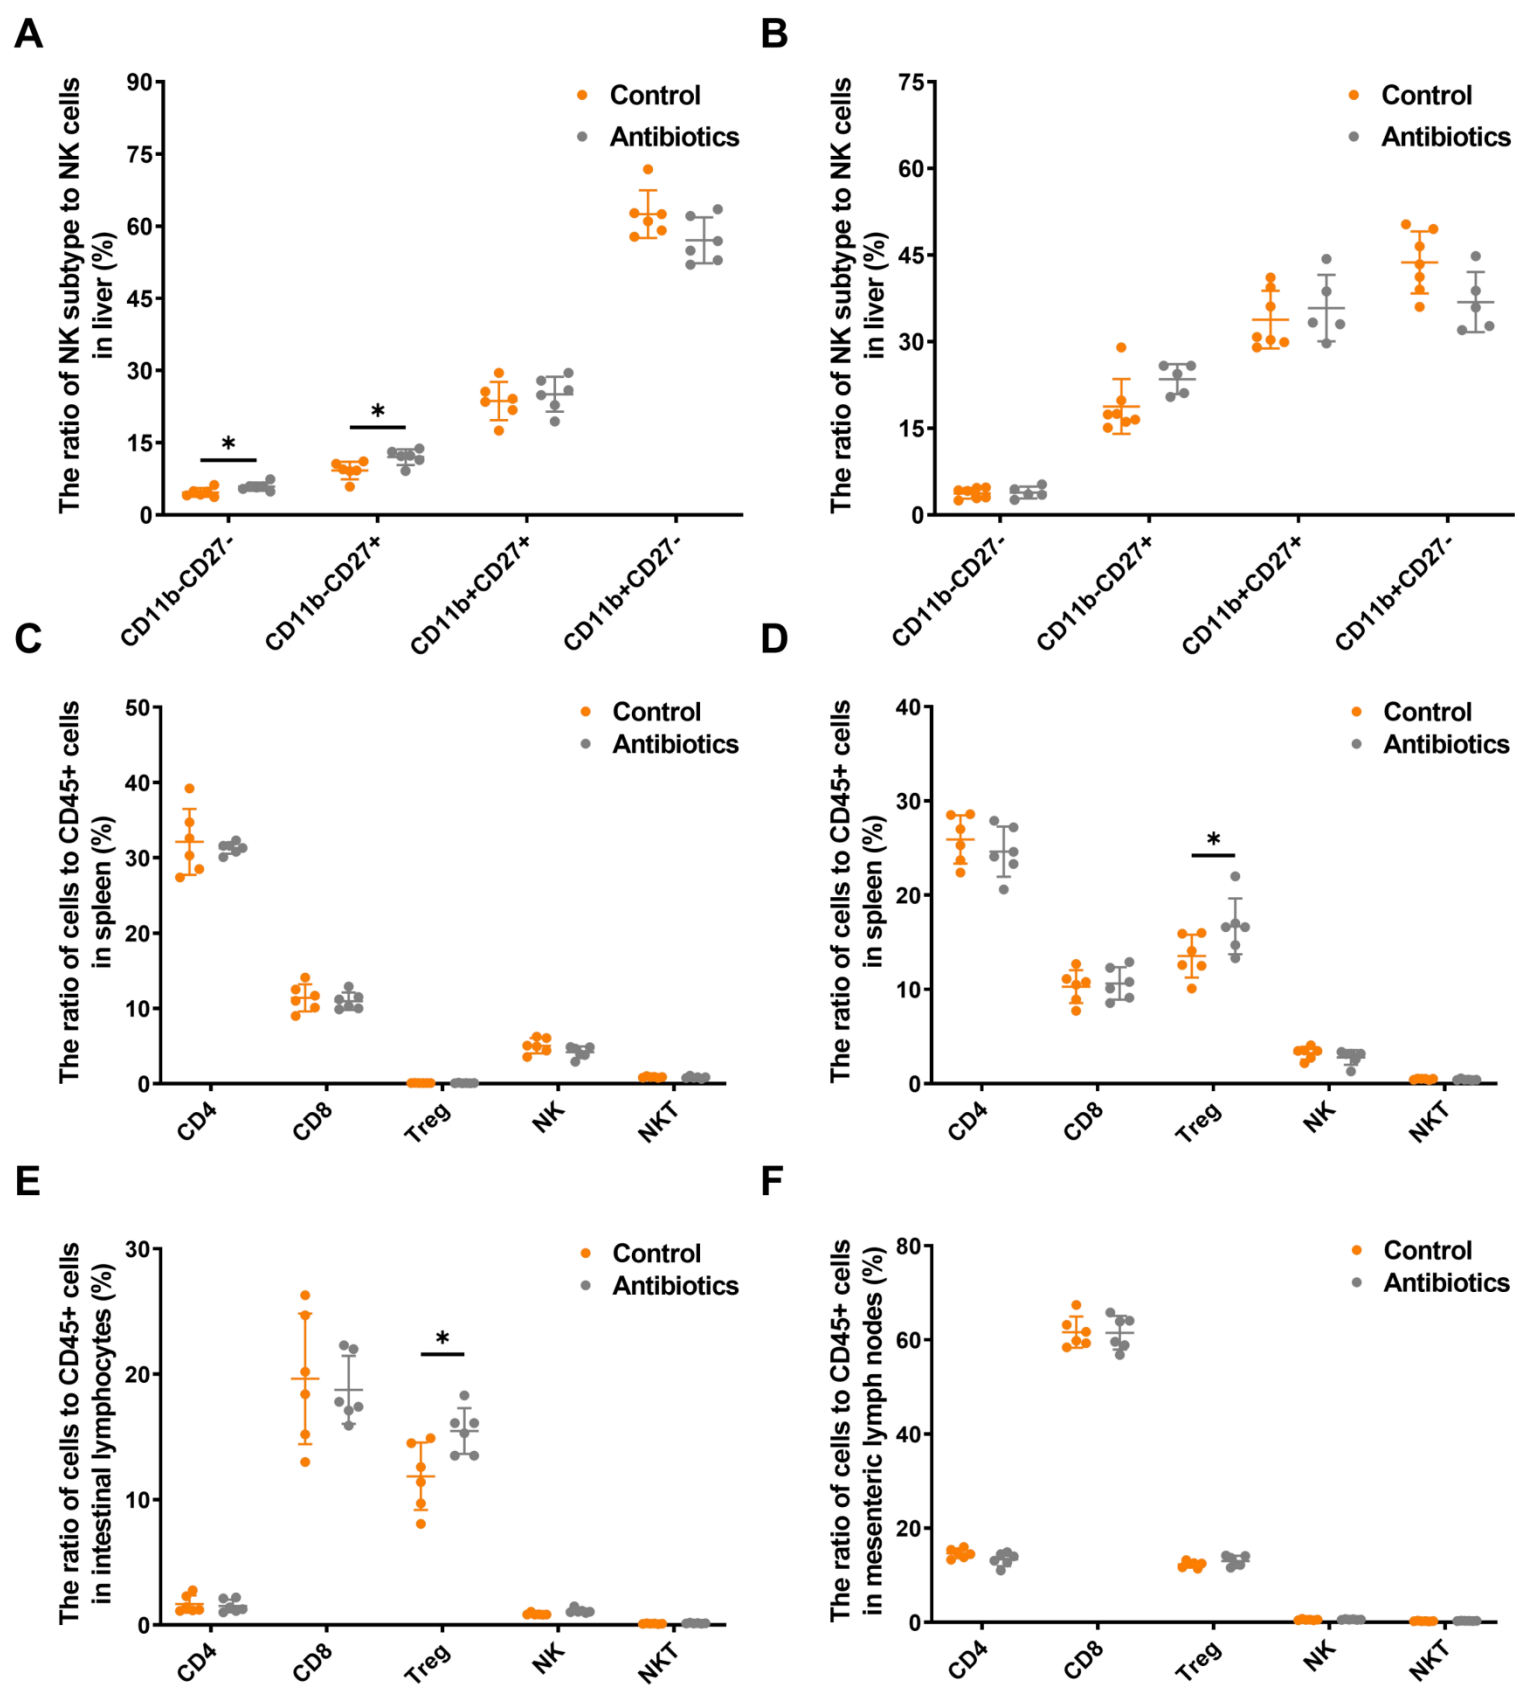

Supplementary Figure 3. Non-absorbable antibiotic treatment has no obvious effect

on the immune system. (A) Changes in NK cell subtypes in BALB/c mice without tumors after treatment with non-absorbable antibiotics for two weeks and (B) in BALB/c mice with metastatic tumors after treatment with non-absorbable antibiotics for four weeks. (C) Spleen infiltrating immune cells in BALB/c mice without tumors after treatment with non-absorbable antibiotics for two weeks and (D) in BALB/c mice with metastatic tumors after treatment with non-absorbable antibiotics for four weeks. (E) Colon and (F) mesenteric lymph node infiltrating immune cells in BALB/c mice after treatment with non-absorbable antibiotics for two weeks. \* $P < 0.05$ .

| Subtype              | Name                             | C1     | C2      | C3     | A1      | A2      | A3      | RSD |
|----------------------|----------------------------------|--------|---------|--------|---------|---------|---------|-----|
| Secondary bile acids | Deoxycholic acid                 | 217.60 | 145.15  | 119.95 | 8.90    | 22.05   | 21.65   | 10% |
|                      | Omega-Muricholic acid            | 66.25  | 62.35   | 58.95  | 14.80   | 40.80   | 23.55   | 3%  |
|                      | murideoxycholic acid             | 0.95   | 2.30    | 0.50   | 0.05    | 0.50    | 1.15    | 5%  |
|                      | Hyodeoxycholic acid              | 11.75  | 11.25   | 9.90   | 3.60    | 5.80    | 6.60    | 8%  |
|                      | Lithocholic acid                 | 6.10   | 7.45    | 5.45   | 3.65    | 5.85    | 7.10    | 12% |
| Primary bile acids   | Taurochenodeoxycholic acid       | 11.65  | 11.45   | 4.50   | 14.95   | 8.95    | 19.55   | 5%  |
|                      | Tauro- $\alpha$ -muricholic acid | 72.85  | 117.25  | 30.65  | 115.30  | 62.50   | 177.30  | 6%  |
|                      | Alpha-Muricholic acid            | 5.45   | 4.75    | 2.75   | 4.15    | 6.90    | 10.10   | 6%  |
|                      | Chenodeoxycholic acid            | 2.60   | 2.30    | 1.90   | 2.60    | 4.45    | 4.10    | 13% |
|                      | Cholic acid                      | 48.30  | 44.50   | 39.70  | 41.50   | 91.40   | 89.85   | 8%  |
|                      | Glycocholic acid                 | 5.05   | 5.40    | 2.10   | 7.25    | 8.40    | 11.00   | 6%  |
|                      | Glycochenodeoxycholic acid       | 0.05   | 0.05    | 0.10   | 0.15    | 0.10    | 0.20    | 9%  |
|                      | Taurocholic acid                 | 953.75 | 1019.75 | 297.45 | 1271.15 | 1746.25 | 3009.85 | 2%  |
|                      | Tauro- $\beta$ -muricholic acid  | 120.70 | 140.15  | 42.45  | 429.15  | 342.80  | 612.90  | 6%  |
|                      | Beta-Muricholic acid             | 34.60  | 33.25   | 31.60  | 93.65   | 297.25  | 250.30  | 8%  |

|  |                                                             |                              |
|--|-------------------------------------------------------------|------------------------------|
|  | Standard for classical pathway of bile acid metabolism      | A:antibiotic treatment group |
|  | Standard for alternative pathway of bile acid metabolism    | C:control group              |
|  | Standard for unique pathway in mice of bile acid metabolism |                              |

**Supplementary Table 1.** Serum bile acid concentrations in targeted metabolomics of bile acids.
